# Supplementary material for: Identification and Characterization of MicroRNAs in the Liver of Blunt Snout Bream (Megalobrama amblycephala) Infected by Aeromonas hydrophila
Source: MDPI journal article supplement (doi:10.3390/ijms17121972), 2016-11-25
Supplement: s1 [file s1]

# Supplementary Materials: Identification and Characterization of MicroRNAs in the Liver of Blunt Snout Bream (*Megalobrama amblycephala*) Infected by *Aeromonas hydrophila*

Lei Cui, Hongtao Hu, Wei Wei, Weimin Wang and Hong Liu

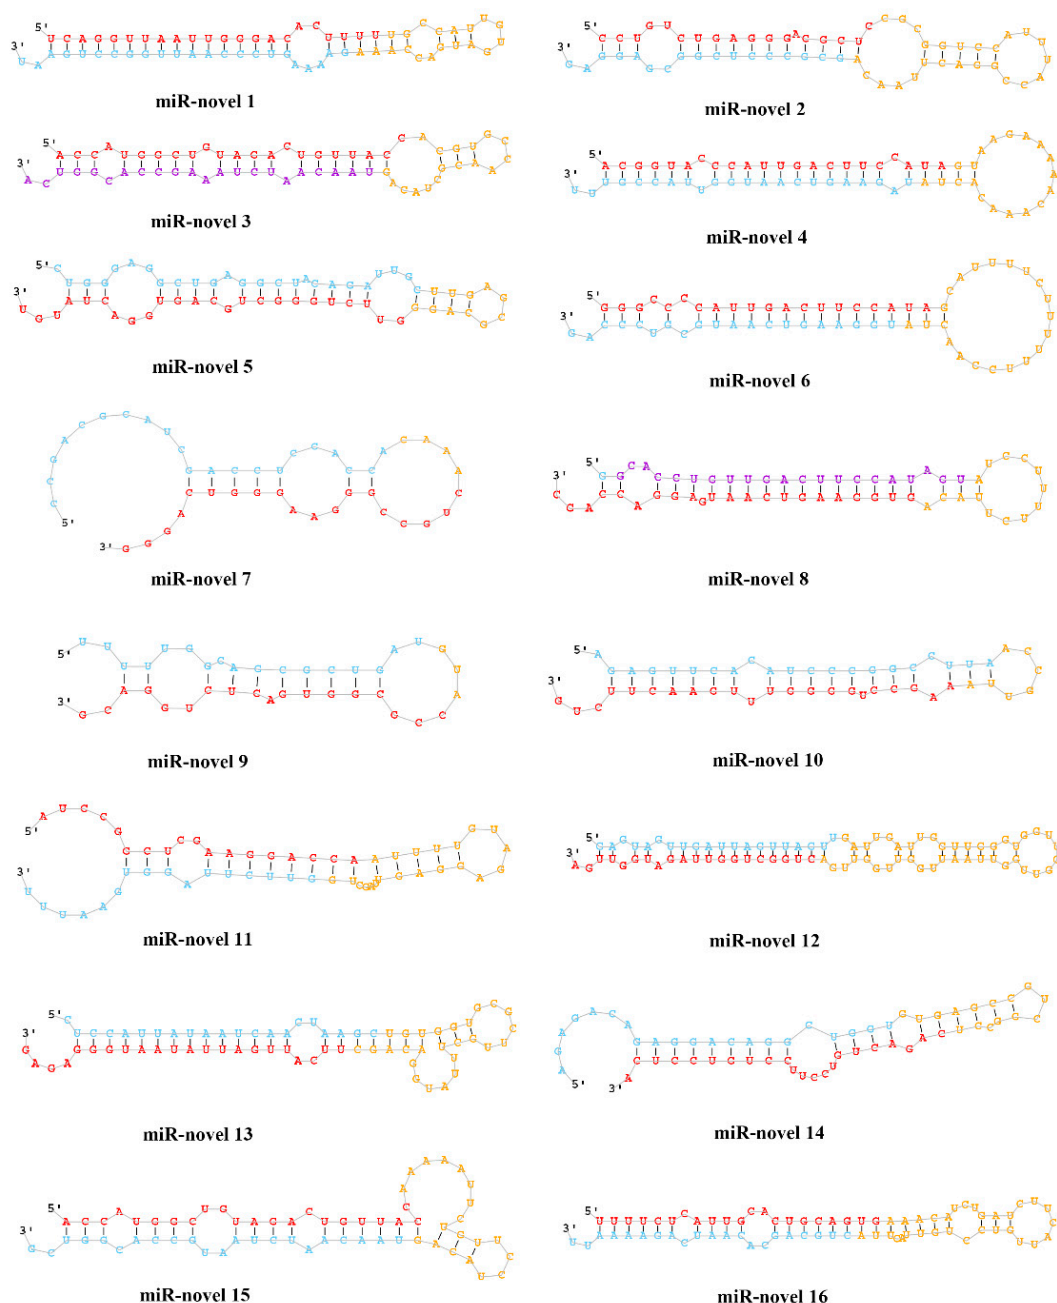

Figure S1. Cont.

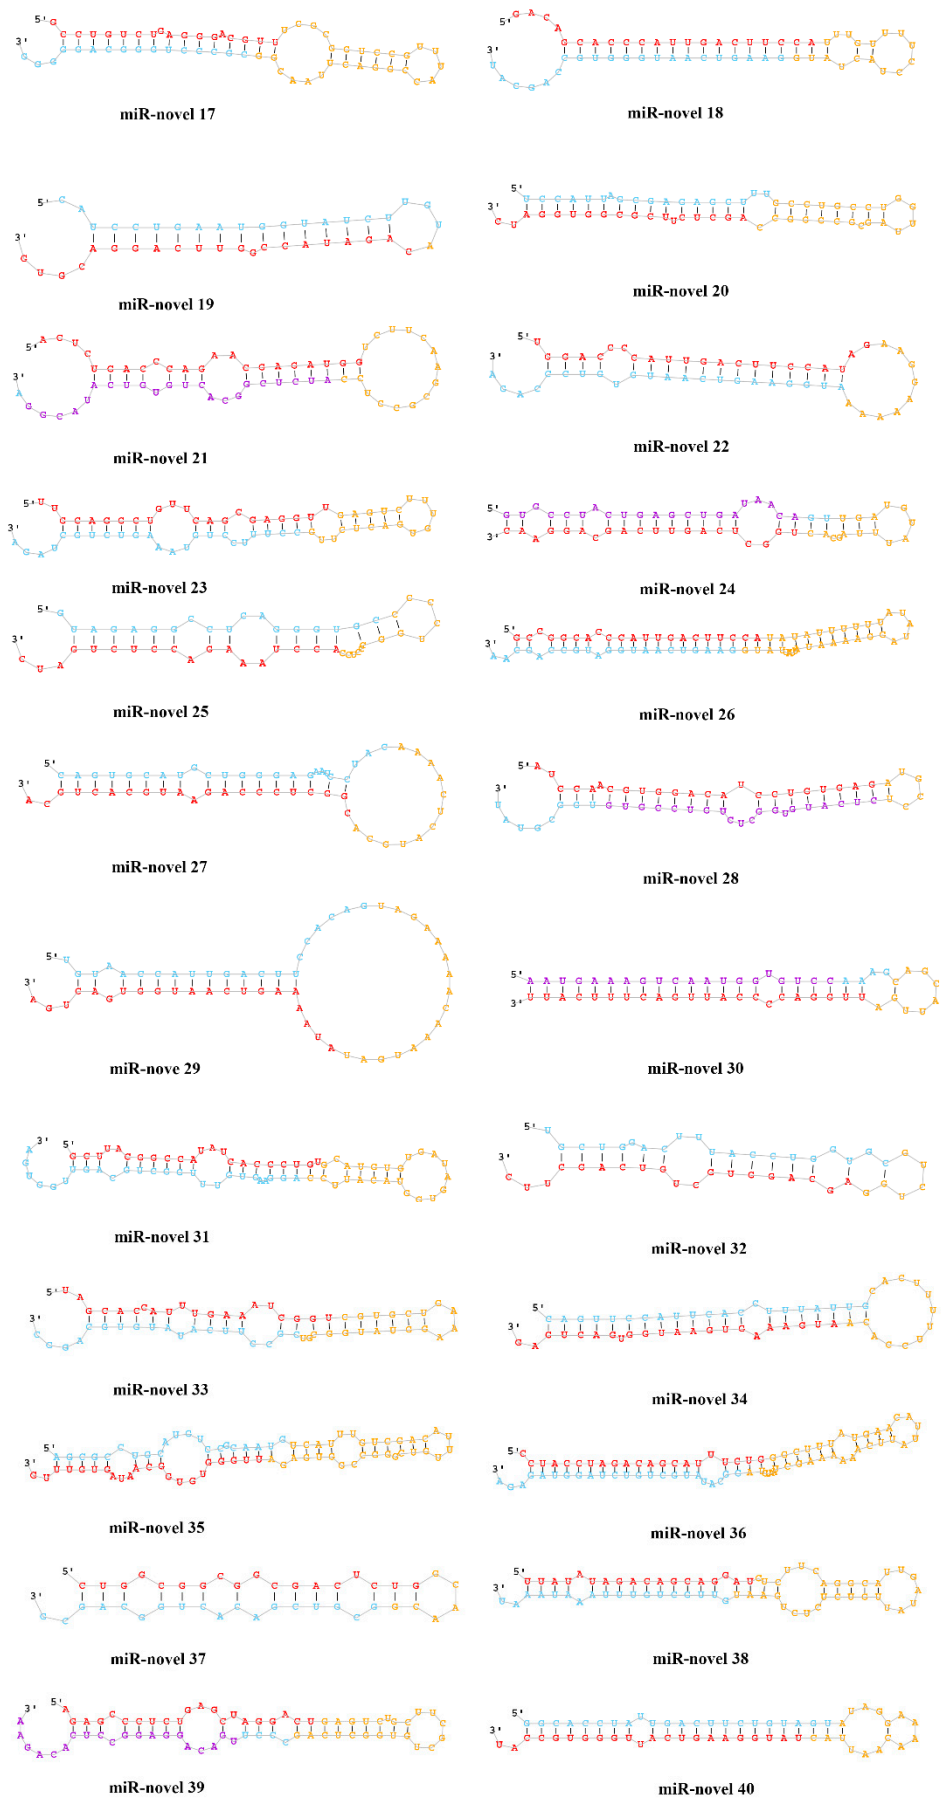

Figure S1. Cont.

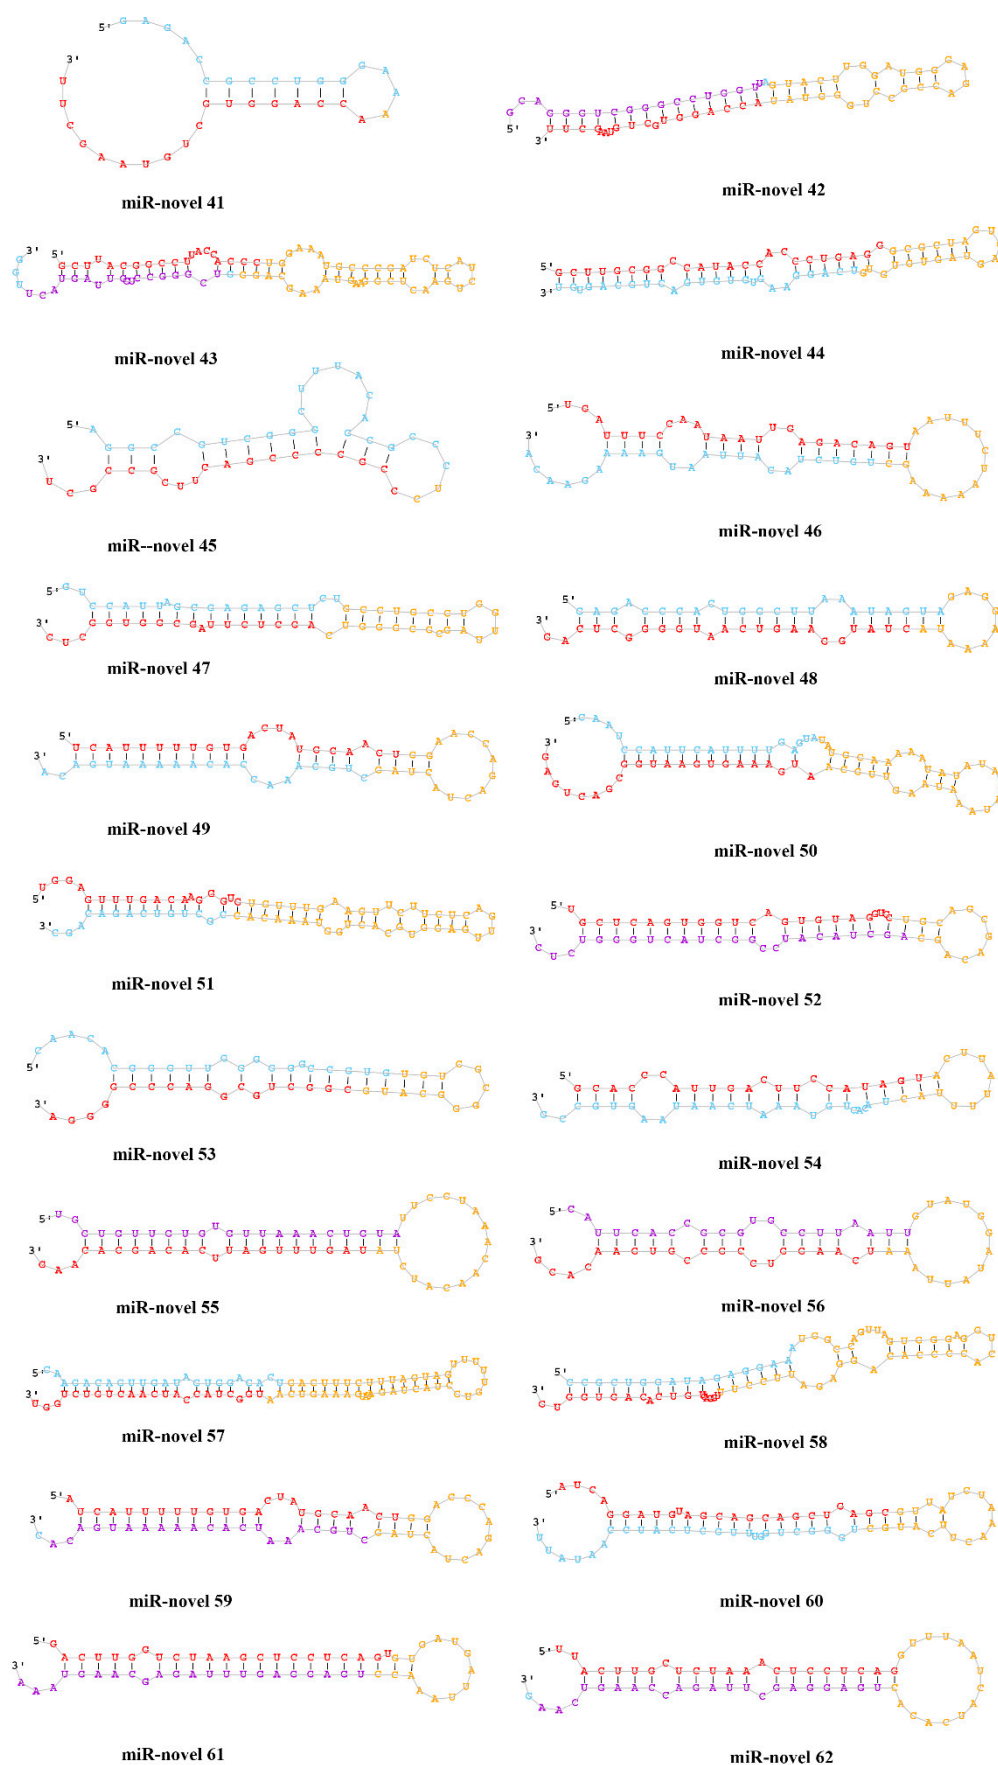

**Figure S1.** Predicted stem-loop secondary structures of all putative novel miRNAs in the liver of *M. amblycephala*.

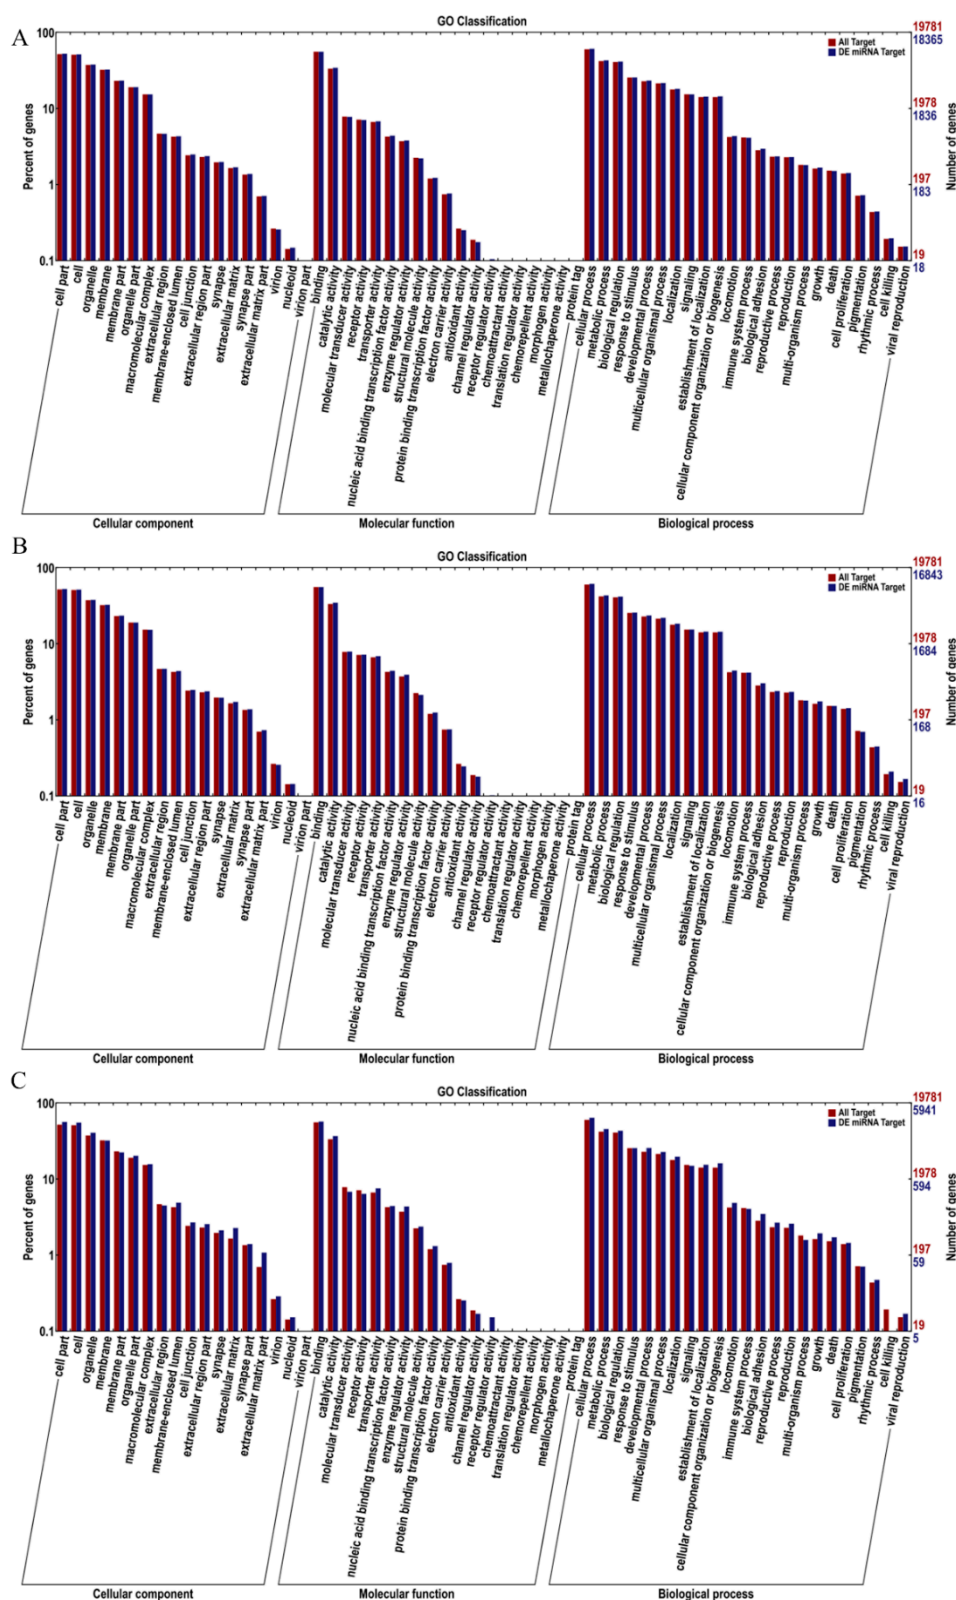

**Figure S2.** GO distribution of target genes of differentially expressed miRNAs in the liver of *M. amblycephala* at various time points post-infection with *A. hydrophila*. **(A)** GO distribution of target genes of differentially expressed miRNAs in the liver of *M. amblycephala* at 4 h post-infection with *A. hydrophila*; **(B)** GO distribution of target genes of differentially expressed miRNAs in the liver of *M. amblycephala* at 24 h post-infection with *A. hydrophila*; **(C)** GO distribution of target genes of differentially expressed miRNAs in the liver of *M. amblycephala* at 24 h post-infection with *A. hydrophila* compared with 4 h.
